# Supplementary material for: Epidermal stem cells (ESCs) accelerate diabetic wound healing via the Notch signalling pathway
Source: Oxford University Press journal article supplement (doi:10.1042/bsr20160034), 2016-04-23
Supplement: bsr036e364add.pdf [file bsr036e364add.pdf]

## Supplementary Table

**Table S1.** Primer sequence for qRT-PCR analysis.

| Gene   | Primer | Sequence 5'-3'         |
|--------|--------|------------------------|
| Dll-1  | F      | GAATGCAAGTGCAGAGTG     |
|        | R      | TAGTTCAGGTCCTGGTTG     |
| Dll-4  | F      | AACTGTCCTTATGGCTTTGT   |
|        | R      | CACACTCGTTCCTCTCTTCT   |
| Jag1   | F      | AGGACTATGAGGGCAAGAAC   |
|        | R      | AAATATAACCGCACCCCTTC   |
| Jag2   | F      | CCTCTGCCTTGCTACAAT     |
|        | R      | GCACTCGTCGATGTTGAT     |
| Notch1 | F      | CTGGTCAGGGAAATCGTG     |
|        | R      | AGATGTAGGAGGCCTCGA     |
| Notch2 | F      | ATCTGCCCTCCACTGGGCAGCT |
|        | R      | TGGGTGGACATGTGCTTCCCT  |
| Notch3 | F      | TGTGGACGAGTGCTCTATCG   |
|        | R      | AATGTCCACCTCGCAATAGG   |
| Notch4 | F      | CAGCCCGAGCAGATGTAGGA   |
|        | R      | CGGCGTCTGTTCCCTACTGT   |
| Hes1   | F      | GGATGCTCTGAAGAAAGATA   |
|        | R      | ACACTTGGGTCTGTGCTC     |
